# Supplementary material
Source: PubMed Central journal article supplement (PMC3696751)
Supplement: 1304714110_pnas.201304714SI.pdf [file 1304714110_pnas.201304714SI.pdf]

# Supporting Information

Hoomann et al. 10.1073/pnas.1304714110

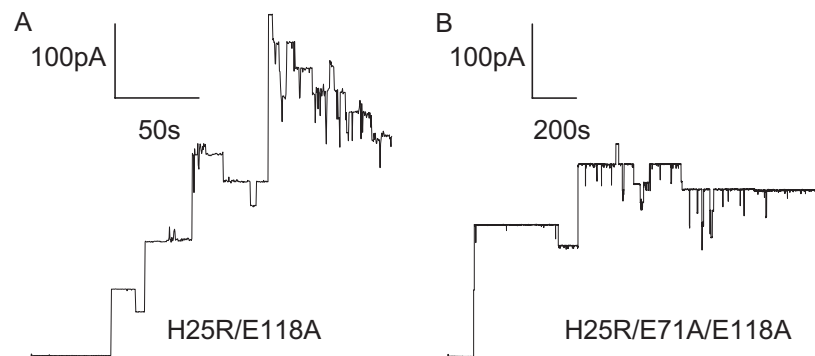

**Fig. S1.** Fusion of  $K^+$ -free proteoliposomes bearing the inactivating KcsA variant (A) and the non-inactivating mutant (B) to a preformed planar bilayer. The experimental conditions were as in Fig. 3 except that (i) the KcsA channels were reconstituted in a  $K^+$ -free medium and (ii) the proteoliposome concentration was increased to show multiple fusion events.
